# Supplementary material for: Wheat AGAMOUS LIKE 6 transcription factors function in stamen development by regulating the expression of Ta APETALA3
Source: Oxford University Press journal article supplement (doi:10.1242/dev.177527), 2019-01-01
Supplement: dev177527supp.pdf [file dev177527supp.pdf]

Figure S1

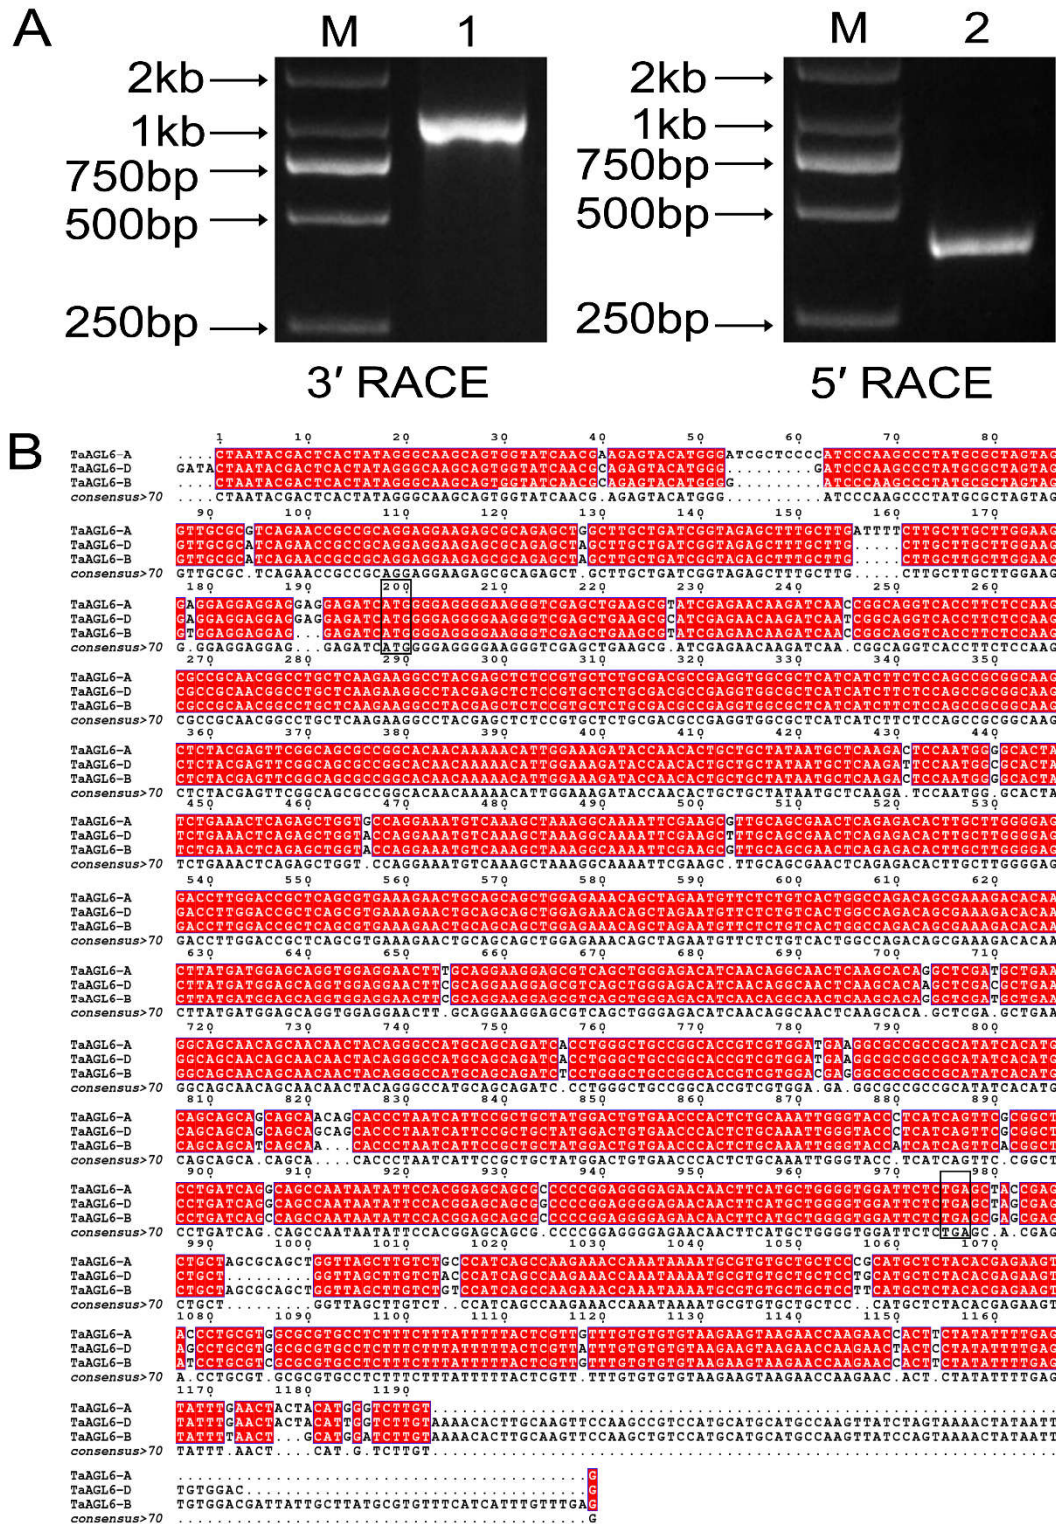

Fig. S1 Full cDNAs of *TaAGL6* genes.

(A) Results of RACE. (B) Alignment of *TaAGL6* full cDNAs. Rectangular boxes indicate the start and stop codons, respectively.

## Figure S2

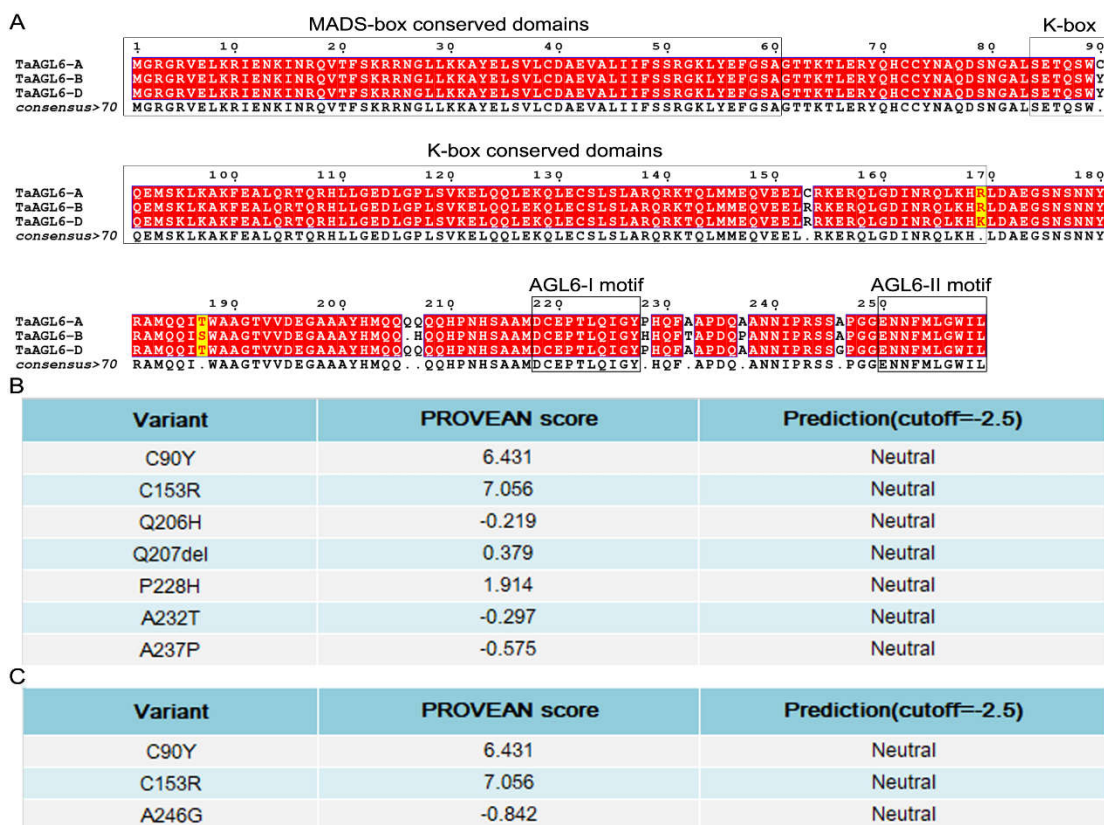

**Fig. S2 Protein sequence and the effect of SNPs.**

(A) Multiple alignment of TaAGL6 proteins. Rectangular boxes indicated MADS-box, K domains, AGL6 motifs I and II, respectively. (B and C) The effect of SNPs to the protein functions. Default threshold is -2.5, that is: The variant with a score equal to or below -2.5 is considered "deleterious," the variants with a score above -2.5 are considered "neutral."

Figure S3

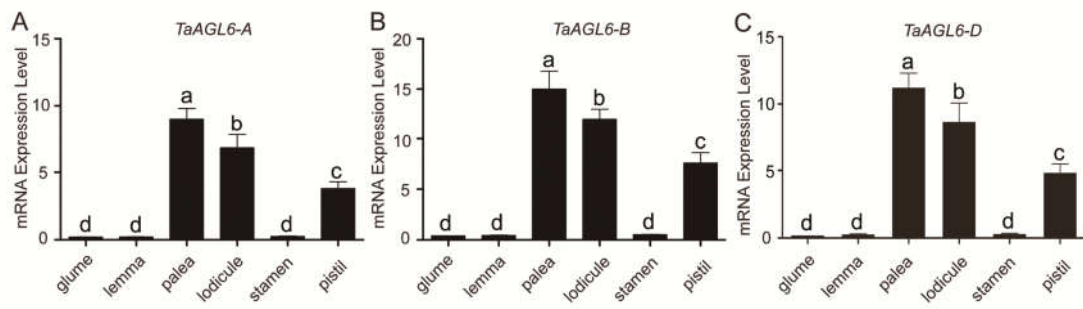

**Fig. S3** The expression of *TaAGL6-A* (A), *TaAGL6-B* (B) and *TaAGL6-D* (C) in different floral organs.

Mean and SD values were obtained from three replications. Different letters indicate a significant difference ( $P < 0.05$  by Student's *t* test).

Figure S4

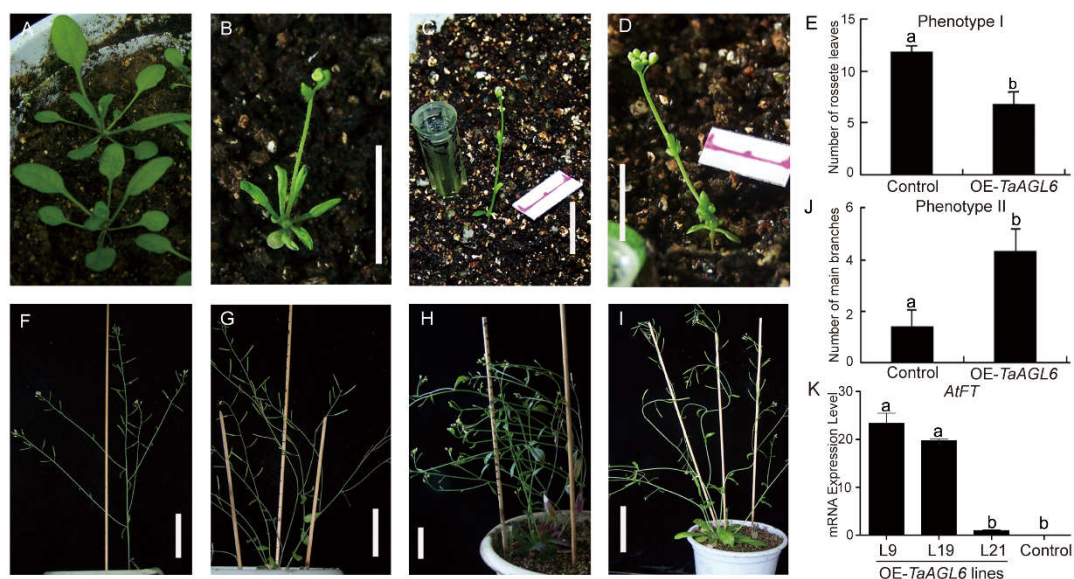

**Fig.S4 Phenotypes of transgenic *Arabidopsis* over-expressing *TaAGL6* genes**

(A-D) Four-week plants of wild type (A) and transgenic *Arabidopsis* overexpressing *TaAGL6-A* (B), *TaAGL6-B* (C), and *TaAGL6-D* (D) to show the early flowering phenotype of transgenic lines. (E) The number of rosette leaves in the control and in transgenic line overexpression *TaAGL6-B* at flowering time. (F-I) Wild type (F), transgenic *Arabidopsis* overexpressing *TaAGL6-A* (G), *TaAGL6-B* (H), and *TaAGL6-D* (I) to show the multi-shoot phenotypes. (J) The number of main stems in the control and transgenic *Arabidopsis* overexpressing *TaAGL6-B*. (K) The expression level of *AtFT* in different transgenic lines. Bars = 1cm in A to D, F to I. In E and J, mean and SD values were obtained from 30 replications (n=30), and letters a and b indicated the significant difference between the control and transgenic plants according to Student's *t*-test ( $P < 0.05$ ). Mean and SD values in K were obtained from three replications, and different letters in K indicated a significant difference ( $P < 0.05$  by Student's *t* test).

Figure S5

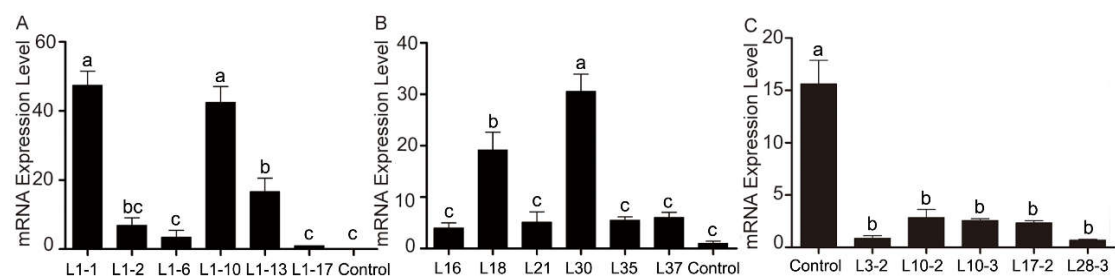

**Fig. S5** The expression of *TaAGL6* genes in transgenic *Arabidopsis* (A), transgenic wheat (B) overexpressing *TaAGL6-B*, and *TaAGL6* RNAi wheat (C).

Mean and SD values were obtained from three replications, and different letters indicated significant differences ( $P < 0.05$  by Student's *t* test).

Figure S6

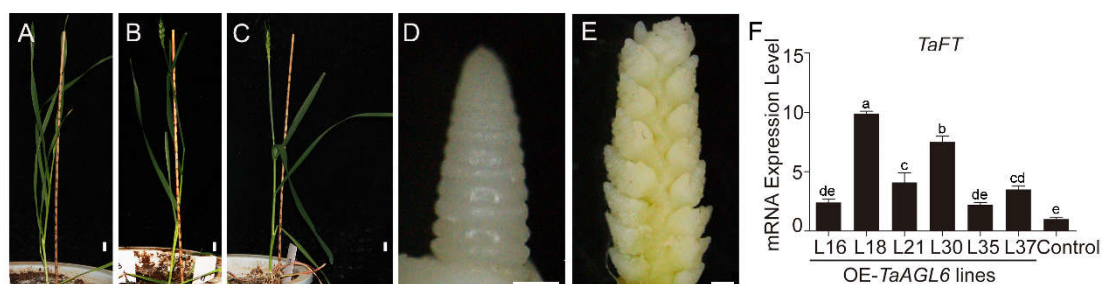

**Fig. S6 Phenotype of transgenic wheat over-expressing *TaAGL6-B*.**

(A-C) One plant of control (A) and transgenic Line 11 (B) and Line 18 (C) photographed at the same time. (D and E) One inflorescence of control (D) and one inflorescence of transgenic plants (E) collected at the same time. (F) The expression of *TaFT* in different transgenic lines at vegetative stage. Bars = 1cm in A-C, 50 $\mu$ m in D and E. Mean and SD values in F were obtained from three replications, and different letters in F indicated a significant difference ( $P < 0.05$  by Student's *t* test).

Figure S7

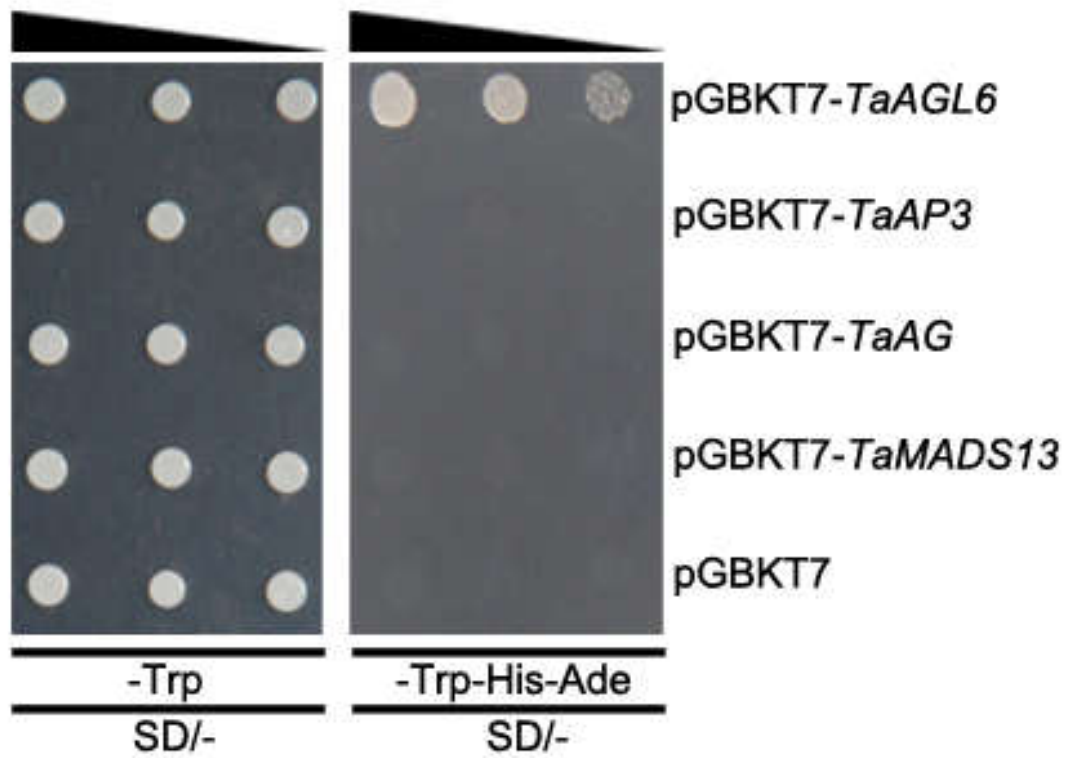

Fig. S7 Self-activation assays of TaAGL6, TaAP3, TaAG, and TaMADS13.

Figure S8

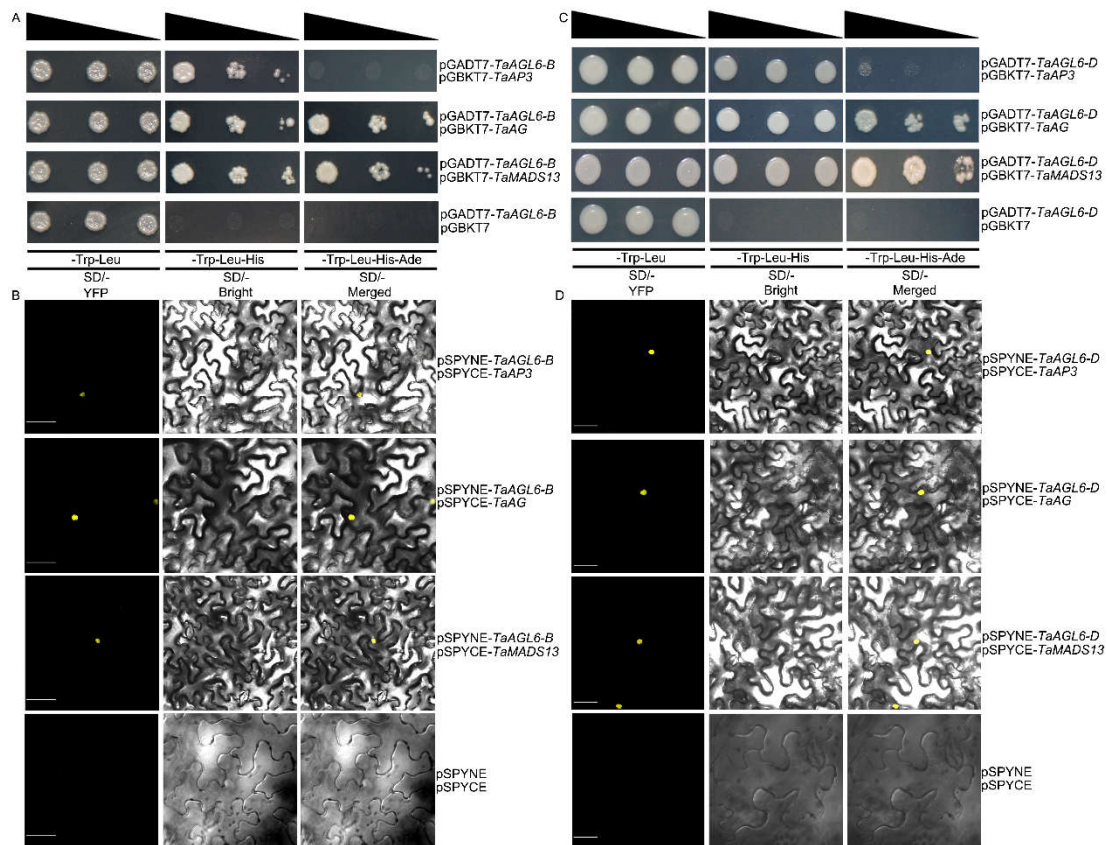

**Fig. S8 Interactions between TaAGL6-B/TaAGL6-D and TaAP3, TaAG, TaMADS13.** (A and B) Interactions between TaAGL6-B and TaAP3, TaAG, TaMADS13 in yeast cells (A), and tobacco leaf cells (B). (C and D) Interactions between TaAGL6-D and TaAP3, TaAG, TaMADS13 in yeast cells (C), and tobacco leaf cells (D). In B and D, left, YFP; middle, Bright; right, Merged.



Figure S9

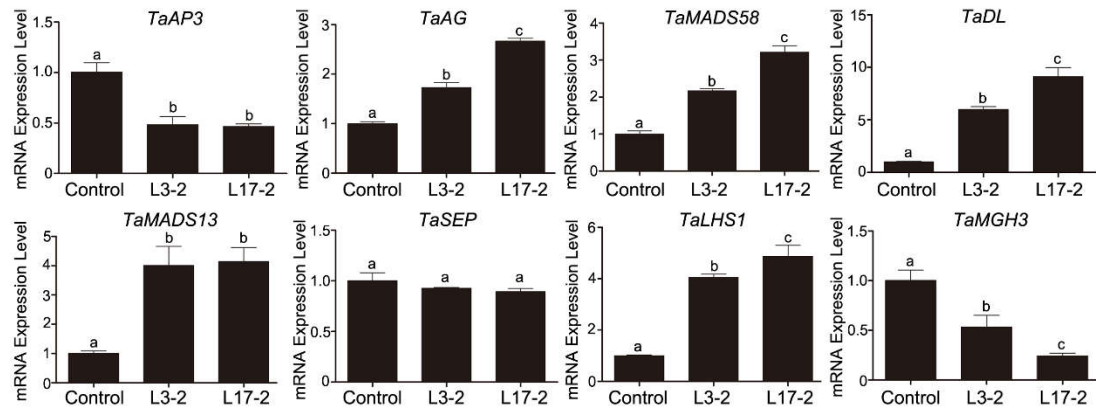

**Fig. S9** The expression of wheat floral genes and *TaMGH3* in wild type and *TaAGL6* RNAi stamens.

Mean and SD values in were obtained from three replications, and different letters indicated significant differences ( $P < 0.05$  by Student's  $t$  test).

Figure S10

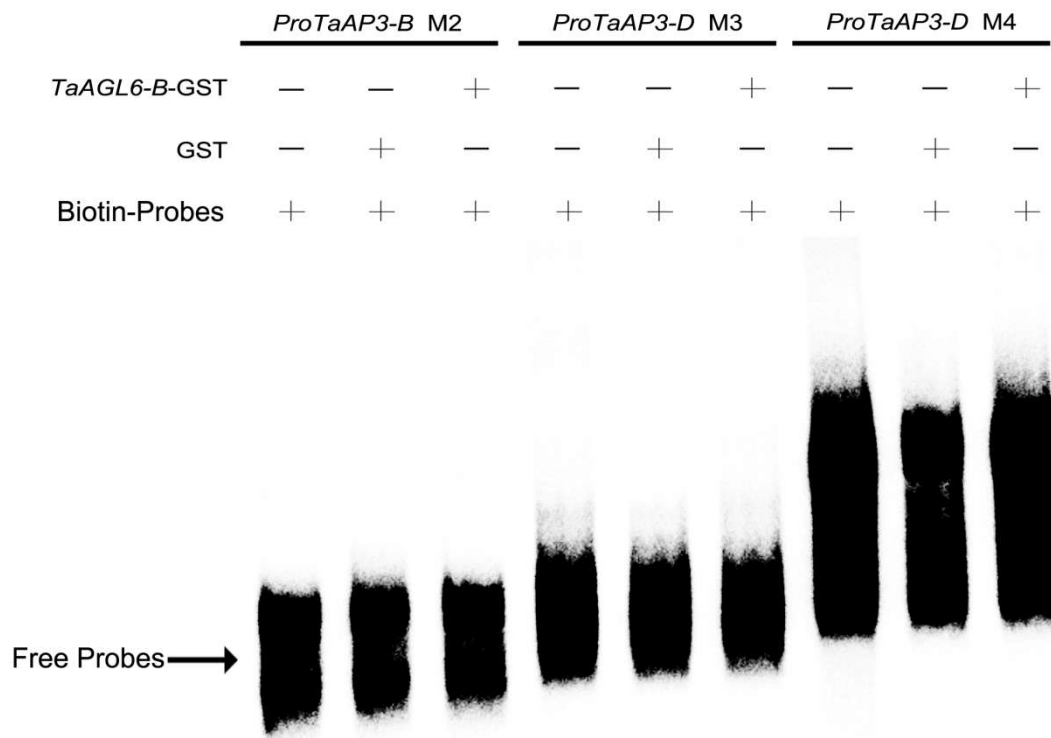

**Fig. S10 Results of EMSA to show that AGL6 proteins could not bind to CArG motifs 2-4.**

Figure S11

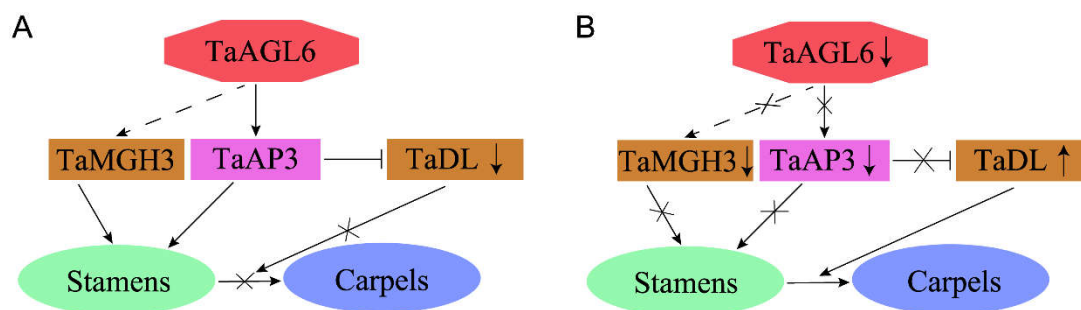

**Fig. S11 Proposed model to illustrate the function and mechanism of TaAGL6 in stamen development**

(A) In wild type wheat, TaAGL6 transcription factors directly and indirectly regulate the expression of *TaAP3* and *TaMAGH3*, respectively. *TaAP3* and *TaMAGH3* function in stamen development. Meanwhile, *TaAP3* represses the expression of *TaDL* in stamens. As a result, stamens develop normally. (B) In *TaAGL6* RNAi plants, the expression of *TaAGL6* genes is down-regulated. Consequently, the expression of *TaAP3* and *TaMAGH3* is down-regulated, while *TaDL* is ectopically expressed in stamens. As a result, the stamens develop abnormally, and display the potential to transform into carpels.

**Table S1. Primers used in this research.**

| Name                 | Sequence (5'-3')                               |
|----------------------|------------------------------------------------|
| 3GSP                 | ATGGGGAGGGGAAGGGTCGAG                          |
| 5GSP                 | ATCTTCCAATGTTTTTGTGTGCC                        |
| TaAGL6ADLF           | TAGTAGGTTGCGCGTCAGAA                           |
| TaAGL6ADLR           | CCTCCTTCCAAGCAAGCAAGAAAAAT                     |
| TaAGL6BDLF           | GAAGGCAGCAACAGCAACAA                           |
| TaAGL6BDLR           | GGAATGATTAGGGTGTGCTGA                          |
| TaAGL6DDLF           | GTACCCTCATCAGTTCGCGG                           |
| TaAGL6DDLRL          | ACAAGCTAACCAGCAGCTCGCT                         |
| TaAGL6DLF            | CTTGCTTGGGGAGGACCTTGA                          |
| TaAGL6DLR            | CATCATAAGTTGTGTCTTTCGCTGT                      |
| TaAGL6RNAiPF         | GGTGGTAAGCTTGC GGCCGCTGAAGGCAGCAACAGCAACA ACTA |
| TaAGL6RNAiPR         | GGTGGTGAATTCGGATCCATGGACAGCTTGGAACTTGCA        |
| T7 promoter sequence | TAATACGACTCACTATAGGG                           |
| TaAGL6T7-F           | TAATACGACTCACTATAGGGCTGAAGGCAGCAACAGCAACA ACTA |
| TaAGL6T7-R           | TAATACGACTCACTATAGGGATGGACAGCTTGGAACTTGCAA     |
| TaActinPF            | TATGCCAGCGGTGCAACAAC                           |
| TaActinPR            | GGAACAGCACCTCAGGGCAC                           |
| TaAGL6OF             | GGTGGTCCATGGGGAGGGGAAGGGTCGAG                  |
| TaAGL6OR             | GGTGGTCACGTGTCAGAGAATCCACCCAGCAT               |
| 1301PF               | GTGATATCTCCACTGACGTAAGGG                       |
| 1301PR               | GATAATCATCGCAAGACCGGCA                         |
| pBSKR                | GACAGCAGCAGTTTCATCAATCA                        |
| AtGAPCPF             | TCAGACTCGAGAAAGCTGCTACC                        |
| AtGAPCPR             | GATCAAGTCGACCACACGGGAA                         |
| TaAGL6PF             | ATGGGGAGGGGAAGGGTC                             |

|                   |                                |
|-------------------|--------------------------------|
| TaAGL6PR          | TCAGAGAATCCACCCCAGCAT          |
| TaAP3PF           | ATGGGGCGGGGAAGAT               |
| TaAP3PR           | TTAGCCGAGGCGCAGGTC             |
| TaAGPF            | ATGCAGATACTCAACGAGCAGCT        |
| TaAGPR            | TCACCTTCCAACGAGTT              |
| TaMADS13PF        | ATGGGGAGGGGAAGGATTG            |
| TaMADS13PR        | CTAGAACTGATGAGCCACATCGC        |
| TaAP3DLF          | AGGAGGCATACAAGAATCTGCA         |
| TaAP3DLR          | GCTAGTAGGAGCGATCGAAGTGA        |
| TaAGDLF           | TACTCCAACAACAGCGTGAAAGC        |
| TaAGDLR           | GTATCGCCTATTAGAGTCCTGTTGG      |
| TaMADS58DLF       | ATCAAGCGCATCGAGAACAC           |
| TaMADS58DLR       | ATGGTTGCTTTCACGCTGTT           |
| TaDLDLF           | AACCTCTCCTTCTCAGCCC            |
| TaDLDLR           | GGGCTTCACAACAAAGGGAG           |
| TaMADS13DLF       | TCAGAACCAAGATTGCGGAGGA         |
| TaMADS13DLR       | CTAGAACTGATGAGCCACATCGC        |
| TaSEPDF           | AAGAAGGCCTACGAGCTCTC           |
| TaSEPDFR          | GGTACTCATTGCGGCTGTTT           |
| TaLHS1DLF         | CTCAAGCATATCAGGTCAAAAAAGAATCAA |
| TaLHS1DLR         | TCAGAAGCCACGTGATCTCTGTT        |
| TaMGH3DLF         | CCTACATCCAGCGCATTGTC           |
| TaMGH3DLR         | ACGAACAGGAAGTAGAGGCC           |
| TaAP3BCARG1PROBEF | AAAAGATCTTTTCGTTCCAGAAGAA      |
| TaAP3BCARG1PROBER | GGTAGCCAAAAAATTCTAAATACCA      |
| TaAP3BCARG2PROBEF | TGCCCGTTCTATTCT                |
| TaAP3BCARG2PROBER | ATCATTGCTTCGCTGCTTT            |
| TaAP3DCARG1PROBEF | GAACGCTAGCTAAGCCATAGG          |
| TaAP3DCARG1PROBER | CTGTCCACTTCCAAAAGAGGT          |

---

|                   |                                                                                        |
|-------------------|----------------------------------------------------------------------------------------|
| TaAP3DCARG2PROBEF | CCTTCTTCCTCCTCCTA                                                                      |
| TaAP3DCARG2PROBER | TGGATAGAAGGGGCATTGTCT                                                                  |
| TaAGL6-BGSTF      | CCTGGGATCCCCGGAATTCATGGGGAGGGGAAGGGTC                                                  |
| TaAGL6-BGSTR      | GTCACGATGCGGCCGCTCGAGTCACCTGTGCTTGAGTTGCCTGTT                                          |
| TaAP3F            | AAGCTTGAATTCGAGCTC<br>GACTAATTAAGCAGACTAATTAAGCAGACTAATTAAGCA<br>GTCGACCTCGAGGCATGT    |
| TaAP3R            | ACATGCCTCGAGGTCGAC<br>TGCTTTAATTAGTCTGCTTTAATTAGTCTGCTTTAATTAGTC<br>GAGCTCGAATTCAGCTT  |
| Mut TaAP3F        | AAGCTTGAATTCGAGCTC<br>GACTCGTTCGCGCAGACTCGTTCGCGCAGACTCGTTCGCGCA<br>GTCGACCTCGAGGCATGT |
| Mut TaAP3R        | ACATGCCTCGAGGTCGAC<br>TGCGCGAACGAGTCTGCGCGAACGAGTCTGCGCGAACGAGTC<br>GAGCTCGAATTCAGCTT  |
| TaAGL6-BOE6HAF    | GTCGACGGTATCGAT AAGCTT ATGGGGAGGGGAAGGGTCGAG                                           |
| TaAGL6-BOE6HAR    | AGAACTAGTGGATCC CCCGGG GAGAATCCACCCAGCAT                                               |
| TaAP31302GFPP     | CATGGTAGATCTG ACTAGT ATGGGGCGGGGAAGAT                                                  |
| TaAP31302GFPR     | GCCCTTGCTCACCAT CCTAGG GCCGAGGCGCAGGTC                                                 |
| TaAG 1302GFPP     | CATGGTAGATCTG ACTAGT ATGCAGATACTCAACGAGCAGCT                                           |
| TaAG 1302GFPR     | GCCCTTGCTCACCAT CCTAGG CCTTCCAAGTACTGAGTT                                              |
| TaMADS13GFPP      | CATGGTAGATCTG ACTAGT ATGGGGAGGGGAAGGATTG                                               |
| TaMADS13GFPR      | GCCCTTGCTCACCAT CCTAGG GAACTGATGAGCCACATCGC                                            |
| TaAGL6-B 62SKF    | CGCTCTAGAACTAGT GGATCC ATGGGGAGGGGAAGGGTCGAG                                           |
| TaAGL6-B 62SKR    | GTCGACGGTATCGAT AAGCTT TCAGAGAATCCACCCAGCAT                                            |
| TaAP3B-0800LUCF   | GGCCCCCTCGAG GTCGACAAAAGATCTTTTCGTTCCAGAAGAA                                           |
| TaAP3B-0800LUCR   | GCTCTAGAACTAGT GGATCC GGGGCGGCCGTGGTTTTGA                                              |

---
